# Supplementary material for: SVD-based Anatomy of Gene Expressions for Correlation Analysis in Arabidopsis thaliana
Source: PubMed Central journal article supplement — DNA Res. 2008 Oct 17;15(6):367–74. doi: 10.1093/dnares/dsn025 (PMC2608847; doi:10.1093/dnares/dsn025), 2008-10-17

## SUPPLEMENTARY DATA

Supplementary Figure S1.

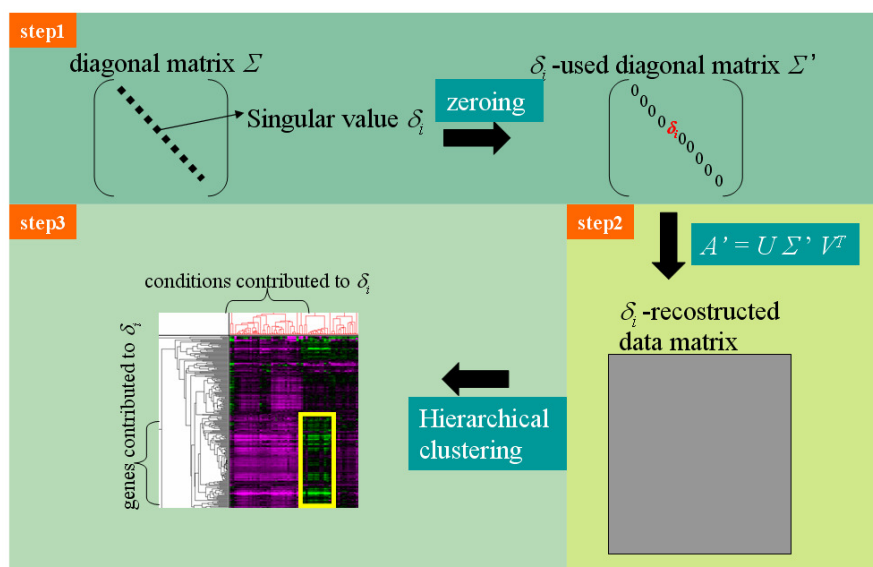

$\delta_1$ 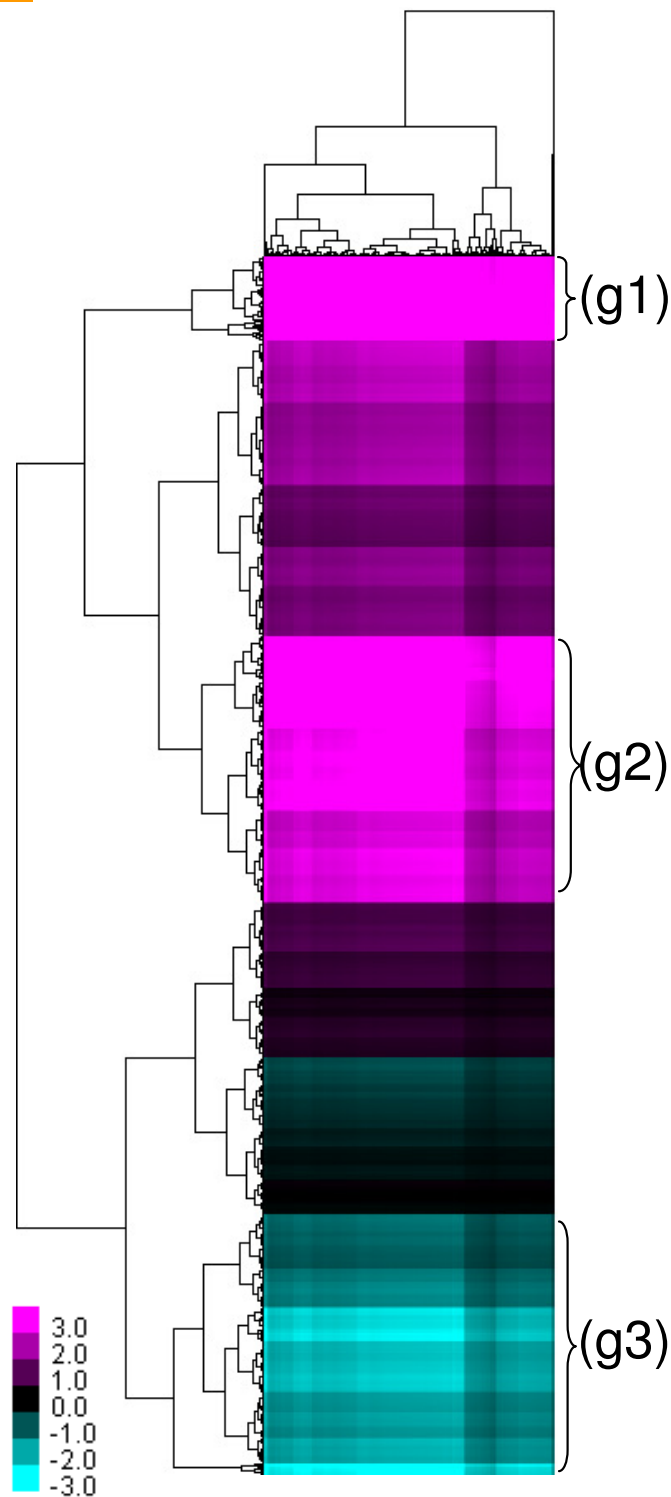

### g1 (113 genes)

#### Functional Categorization by annotation for : GO Biological Process

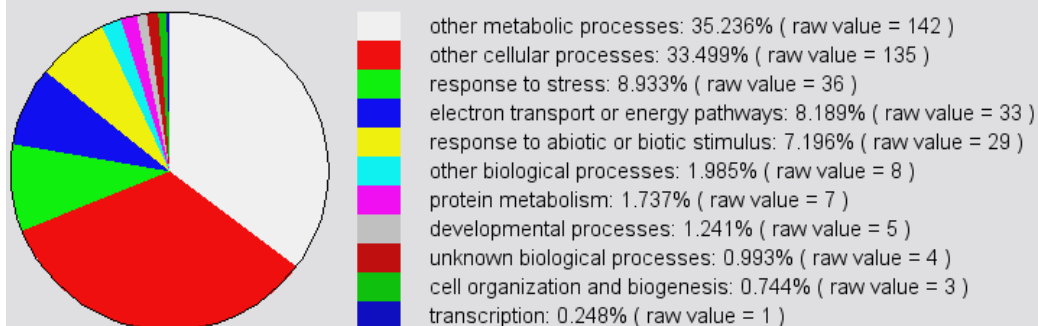

### g2 (358 genes)

#### Functional Categorization by annotation for : GO Biological Process

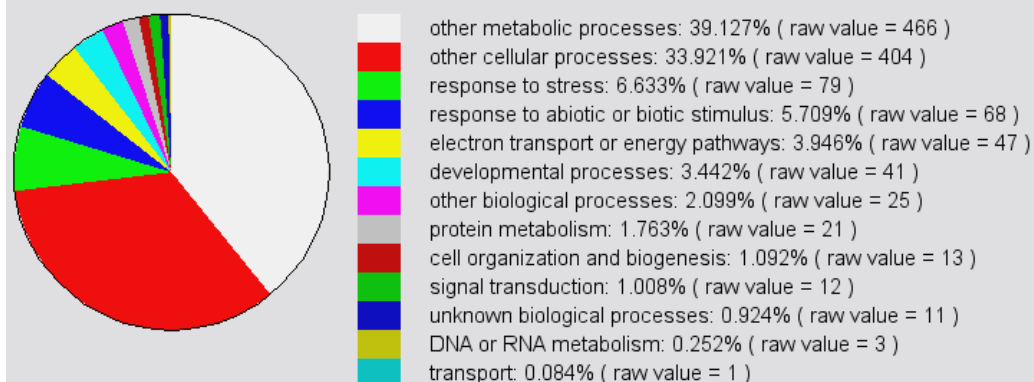

### g3 (350 genes)

#### Functional Categorization by annotation for : GO Biological Process

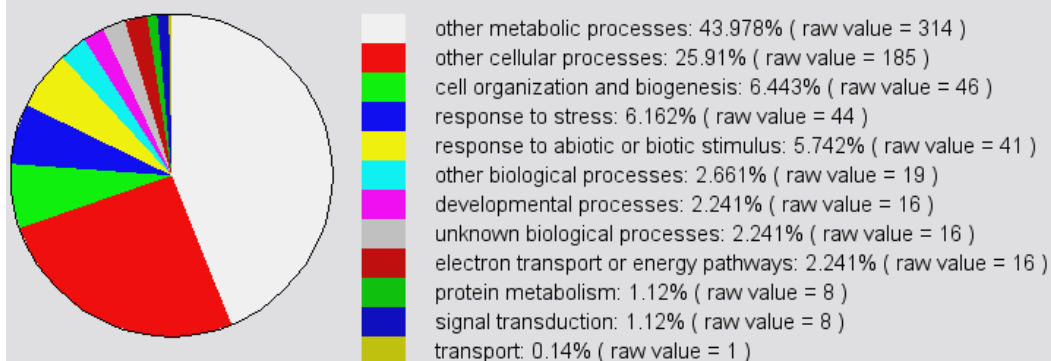

$\delta_2$ 

atr2 (848 conditions)

atr1 (597 conditions)

(g1)  
(g2)  
(g3)

(g4)

3.0  
2.0  
1.0  
0.0  
-1.0  
-2.0  
-3.0

g1 (78 genes)

Functional Categorization by annotation for : GO Biological Process

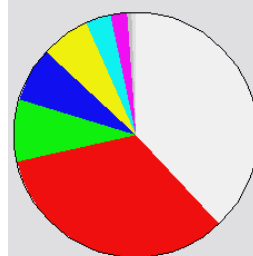

other metabolic processes: 38.127% ( raw value = 114 )  
other cellular processes: 33.445% ( raw value = 100 )  
electron transport or energy pathways: 8.361% ( raw value = 25 )  
response to abiotic or biotic stimulus: 7.358% ( raw value = 22 )  
response to stress: 6.355% ( raw value = 19 )  
other biological processes: 3.344% ( raw value = 10 )  
protein metabolism: 2.341% ( raw value = 7 )  
unknown biological processes: 0.669% ( raw value = 2 )

g2 (14 genes)

Functional Categorization by annotation for : GO Biological Process

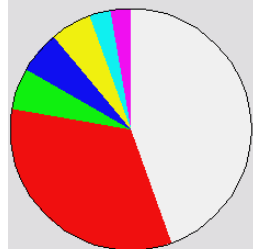

other metabolic processes: 44.444% ( raw value = 16 )  
other cellular processes: 33.333% ( raw value = 12 )  
response to stress: 5.556% ( raw value = 2 )  
electron transport or energy pathways: 5.556% ( raw value = 2 )  
response to abiotic or biotic stimulus: 5.556% ( raw value = 2 )  
other biological processes: 2.778% ( raw value = 1 )  
cell organization and biogenesis: 2.778% ( raw value = 1 )

g3 (182 genes)

Functional Categorization by annotation for : GO Biological Process

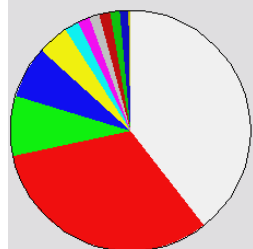

other metabolic processes: 39.444% ( raw value = 213 )  
other cellular processes: 32.222% ( raw value = 174 )  
response to stress: 8.148% ( raw value = 44 )  
response to abiotic or biotic stimulus: 7.037% ( raw value = 38 )  
electron transport or energy pathways: 4.074% ( raw value = 22 )  
other biological processes: 1.852% ( raw value = 10 )  
protein metabolism: 1.667% ( raw value = 9 )  
developmental processes: 1.481% ( raw value = 8 )  
cell organization and biogenesis: 1.481% ( raw value = 8 )  
unknown biological processes: 1.296% ( raw value = 7 )  
signal transduction: 1.111% ( raw value = 6 )  
transport: 0.185% ( raw value = 1 )

g4 (239 genes)

Functional Categorization by annotation for : GO Biological Process

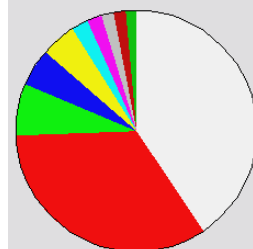

other metabolic processes: 40.551% ( raw value = 309 )  
other cellular processes: 33.99% ( raw value = 259 )  
response to stress: 6.824% ( raw value = 52 )  
electron transport or energy pathways: 4.987% ( raw value = 38 )  
response to abiotic or biotic stimulus: 4.856% ( raw value = 37 )  
developmental processes: 2.1% ( raw value = 16 )  
unknown biological processes: 1.837% ( raw value = 14 )  
other biological processes: 1.706% ( raw value = 13 )  
cell organization and biogenesis: 1.575% ( raw value = 12 )  
protein metabolism: 1.312% ( raw value = 10 )  
transcription: 0.131% ( raw value = 1 )  
signal transduction: 0.131% ( raw value = 1 )

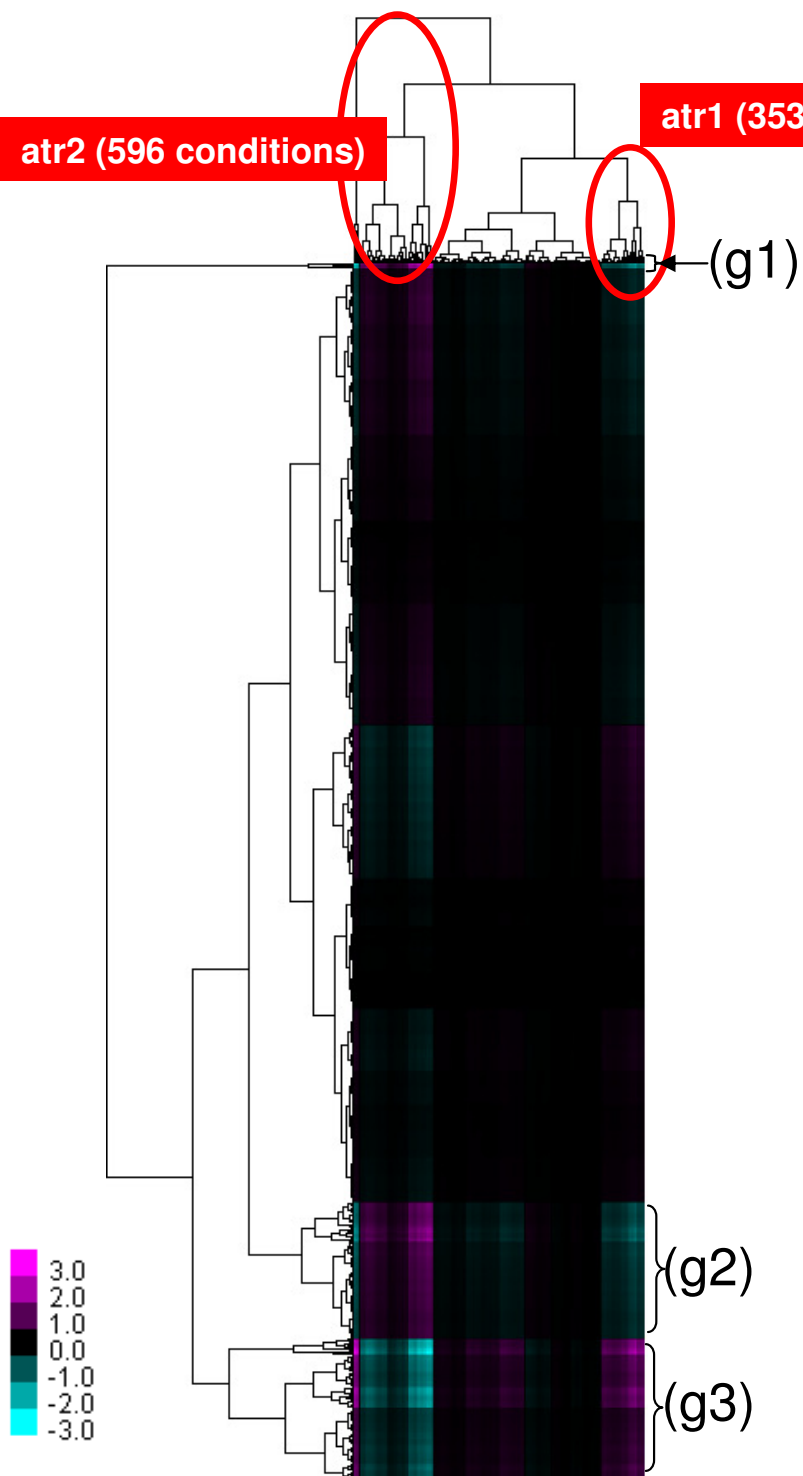

### g1 (7 genes)

#### Functional Categorization by annotation for : GO Biological Process

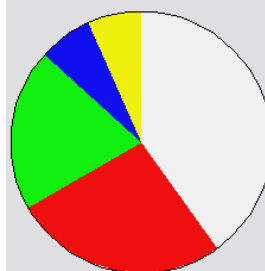

other metabolic processes: 40% ( raw value = 6 )  
other cellular processes: 26.667% ( raw value = 4 )  
cell organization and biogenesis: 20% ( raw value = 3 )  
developmental processes: 6.667% ( raw value = 1 )  
response to abiotic or biotic stimulus: 6.667% ( raw value = 1 )

### g2 (184 genes)

#### Functional Categorization by annotation for : GO Biological Process

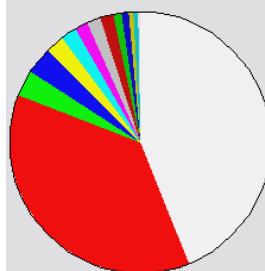

other metabolic processes: 43.794% ( raw value = 247 )  
other cellular processes: 36.879% ( raw value = 208 )  
developmental processes: 3.369% ( raw value = 19 )  
response to abiotic or biotic stimulus: 3.369% ( raw value = 19 )  
response to stress: 2.305% ( raw value = 13 )  
protein metabolism: 1.95% ( raw value = 11 )  
other biological processes: 1.773% ( raw value = 10 )  
cell organization and biogenesis: 1.773% ( raw value = 10 )  
electron transport or energy pathways: 1.773% ( raw value = 10 )  
unknown biological processes: 1.241% ( raw value = 7 )  
DNA or RNA metabolism: 0.709% ( raw value = 4 )  
transport: 0.532% ( raw value = 3 )  
signal transduction: 0.532% ( raw value = 3 )

### g3 (192 genes)

#### Functional Categorization by annotation for : GO Biological Process

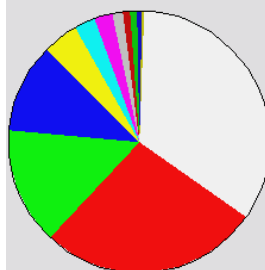

other metabolic processes: 34.609% ( raw value = 208 )  
other cellular processes: 27.121% ( raw value = 163 )  
response to stress: 14.309% ( raw value = 86 )  
response to abiotic or biotic stimulus: 10.982% ( raw value = 66 )  
other biological processes: 4.326% ( raw value = 26 )  
unknown biological processes: 2.496% ( raw value = 15 )  
cell organization and biogenesis: 2.329% ( raw value = 14 )  
developmental processes: 1.331% ( raw value = 8 )  
protein metabolism: 0.832% ( raw value = 5 )  
signal transduction: 0.832% ( raw value = 5 )  
electron transport or energy pathways: 0.666% ( raw value = 4 )  
transport: 0.166% ( raw value = 1 )

atr2 (248 conditions)

atr1 (225 conditions)

(g1)

g1 (143 genes)

Functional Categorization by annotation for : GO Biological Process

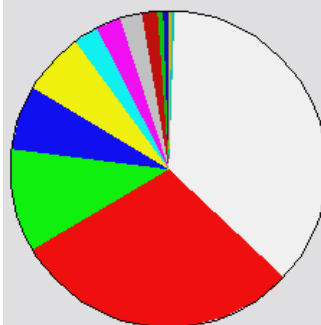

other metabolic processes: 36.905% ( raw value = 155 )  
 other cellular processes: 29.524% ( raw value = 124 )  
 response to stress: 10.476% ( raw value = 44 )  
 response to abiotic or biotic stimulus: 6.667% ( raw value = 28 )  
 other biological processes: 6.429% ( raw value = 27 )  
 cell organization and biogenesis: 2.381% ( raw value = 10 )  
 electron transport or energy pathways: 2.381% ( raw value = 10 )  
 developmental processes: 2.143% ( raw value = 9 )  
 unknown biological processes: 1.667% ( raw value = 7 )  
 protein metabolism: 0.476% ( raw value = 2 )  
 signal transduction: 0.476% ( raw value = 2 )  
 transport: 0.238% ( raw value = 1 )  
 DNA or RNA metabolism: 0.238% ( raw value = 1 )

g2 (78 genes)

Functional Categorization by annotation for : GO Biological Process

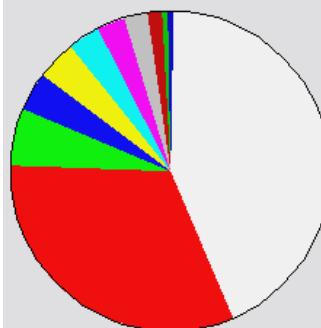

other metabolic processes: 43.541% ( raw value = 91 )  
 other cellular processes: 32.057% ( raw value = 67 )  
 response to abiotic or biotic stimulus: 5.742% ( raw value = 12 )  
 cell organization and biogenesis: 3.828% ( raw value = 8 )  
 electron transport or energy pathways: 3.828% ( raw value = 8 )  
 response to stress: 3.349% ( raw value = 7 )  
 other biological processes: 2.871% ( raw value = 6 )  
 unknown biological processes: 2.392% ( raw value = 5 )  
 developmental processes: 1.435% ( raw value = 3 )  
 transport: 0.478% ( raw value = 1 )  
 signal transduction: 0.478% ( raw value = 1 )

3.0  
2.0  
1.0  
0.0  
-1.0  
-2.0  
-3.0

(g2)

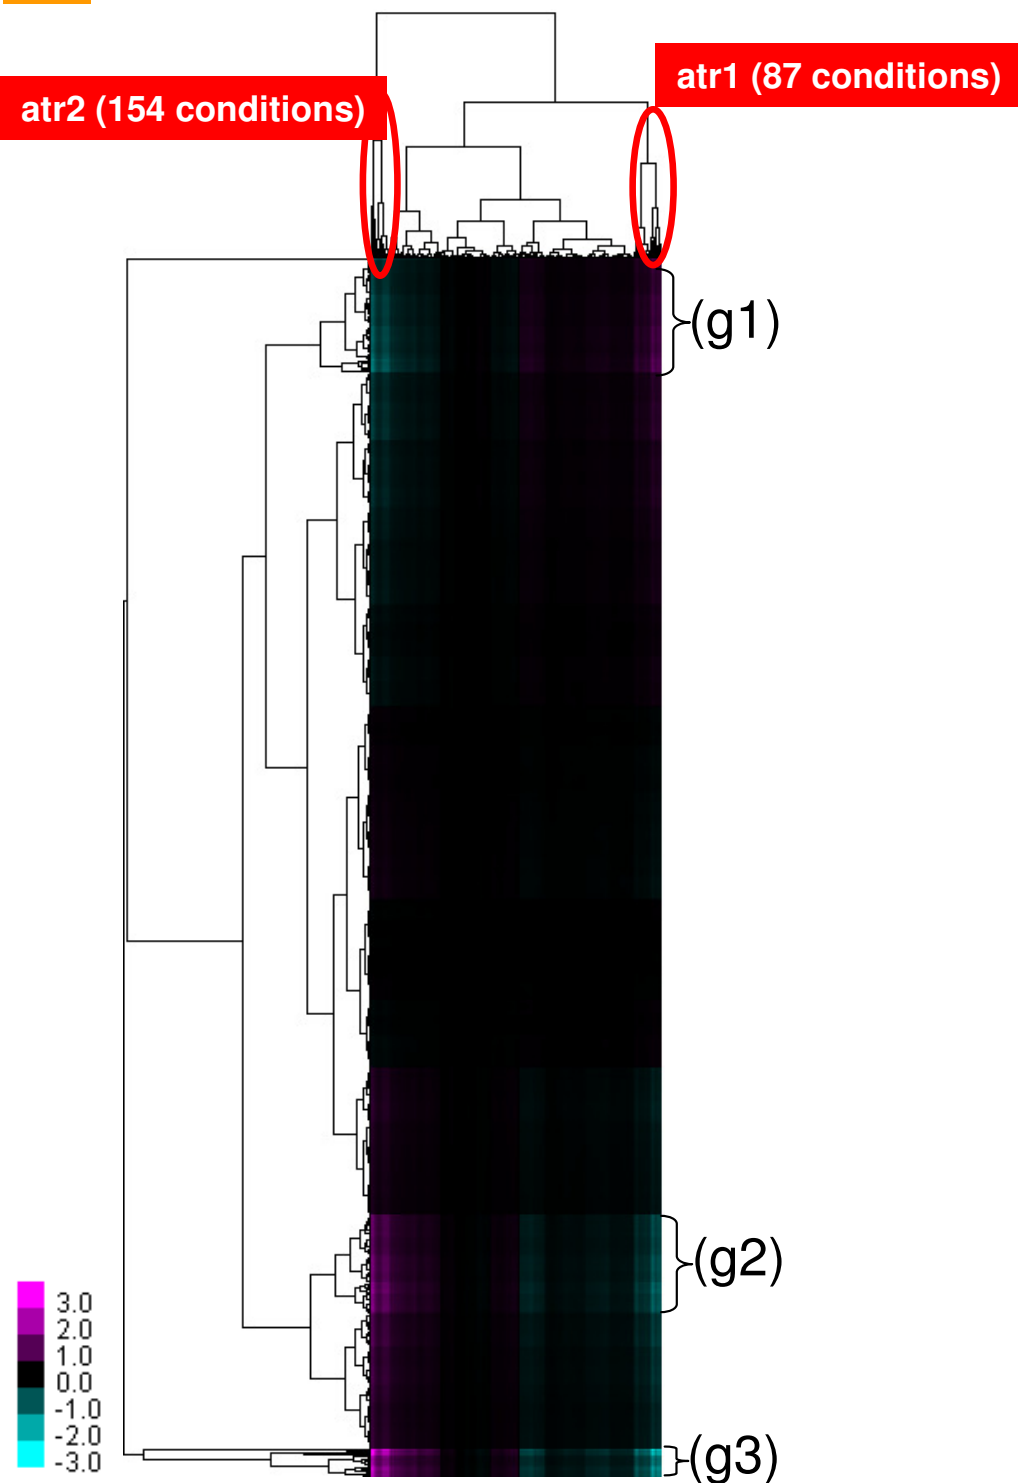

### g1 (152 genes)

#### Functional Categorization by annotation for : GO Biological Process

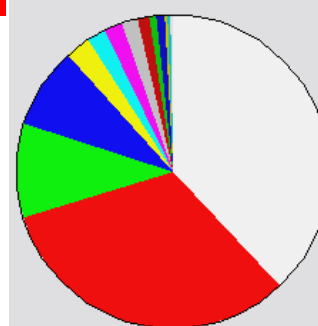

|                                         |                           |
|-----------------------------------------|---------------------------|
| other metabolic processes:              | 38% ( raw value = 190 )   |
| other cellular processes:               | 32.2% ( raw value = 161 ) |
| response to stress:                     | 9.8% ( raw value = 49 )   |
| response to abiotic or biotic stimulus: | 8.4% ( raw value = 42 )   |
| protein metabolism:                     | 2.6% ( raw value = 13 )   |
| developmental processes:                | 2% ( raw value = 10 )     |
| other biological processes:             | 2% ( raw value = 10 )     |
| electron transport or energy pathways:  | 1.8% ( raw value = 9 )    |
| cell organization and biogenesis:       | 1% ( raw value = 5 )      |
| signal transduction:                    | 0.8% ( raw value = 4 )    |
| unknown biological processes:           | 0.8% ( raw value = 4 )    |
| DNA or RNA metabolism:                  | 0.4% ( raw value = 2 )    |
| transport:                              | 0.2% ( raw value = 1 )    |

### g2 (132 genes)

#### Functional Categorization by annotation for : GO Biological Process

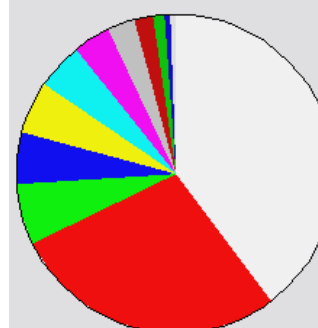

|                                         |                             |
|-----------------------------------------|-----------------------------|
| other metabolic processes:              | 39.763% ( raw value = 134 ) |
| other cellular processes:               | 28.19% ( raw value = 95 )   |
| response to abiotic or biotic stimulus: | 6.231% ( raw value = 21 )   |
| response to stress:                     | 5.341% ( raw value = 18 )   |
| cell organization and biogenesis:       | 5.341% ( raw value = 18 )   |
| electron transport or energy pathways:  | 4.748% ( raw value = 16 )   |
| other biological processes:             | 3.858% ( raw value = 13 )   |
| unknown biological processes:           | 2.671% ( raw value = 9 )    |
| protein metabolism:                     | 2.077% ( raw value = 7 )    |
| developmental processes:                | 1.187% ( raw value = 4 )    |
| signal transduction:                    | 0.593% ( raw value = 2 )    |

### g3 (37 genes)

#### Functional Categorization by annotation for : GO Biological Process

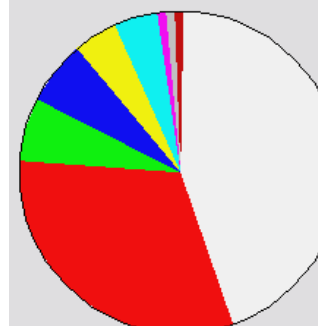

|                                         |                            |
|-----------------------------------------|----------------------------|
| other metabolic processes:              | 44.643% ( raw value = 50 ) |
| other cellular processes:               | 31.25% ( raw value = 35 )  |
| response to stress:                     | 6.25% ( raw value = 7 )    |
| response to abiotic or biotic stimulus: | 6.25% ( raw value = 7 )    |
| other biological processes:             | 4.464% ( raw value = 5 )   |
| cell organization and biogenesis:       | 4.464% ( raw value = 5 )   |
| transport:                              | 0.893% ( raw value = 1 )   |
| unknown biological processes:           | 0.893% ( raw value = 1 )   |
| electron transport or energy pathways:  | 0.893% ( raw value = 1 )   |

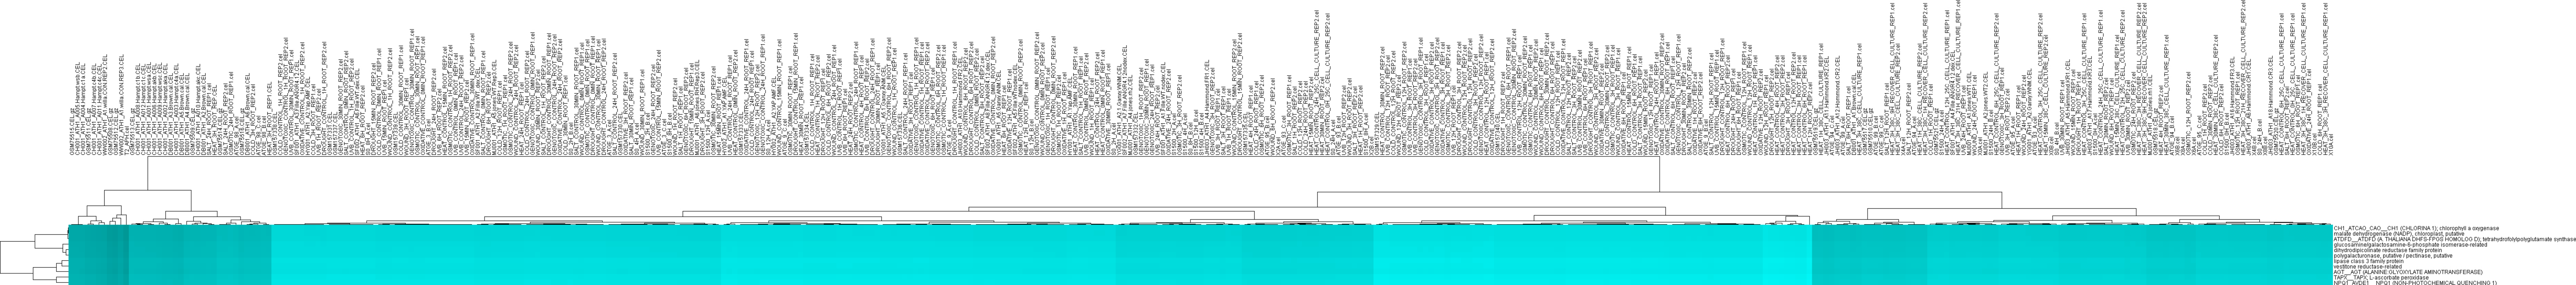



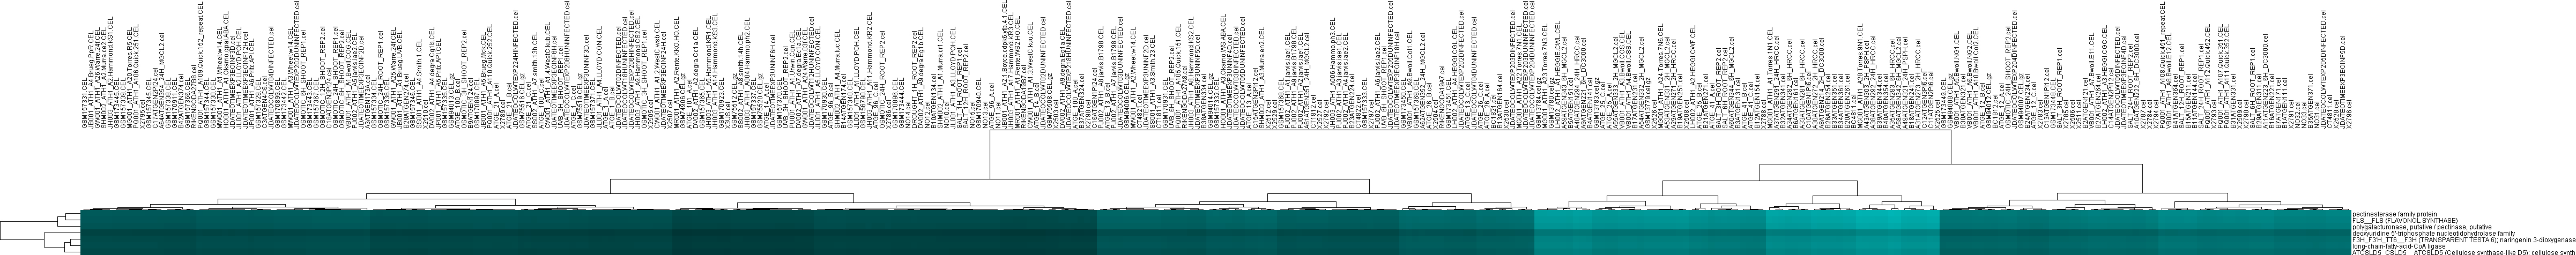

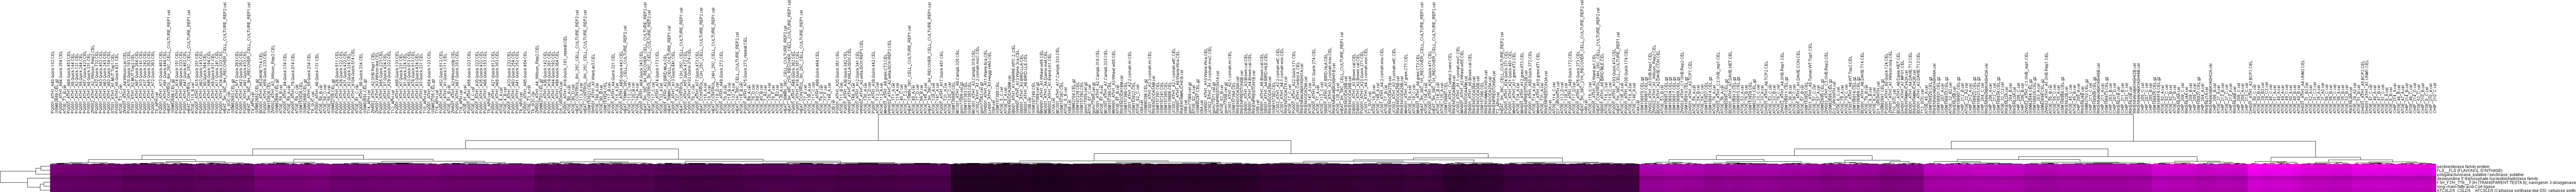

pectinesterase family protein  
FLS\_FLS3 (FLAVONOL SYNTHASE)  
polygalacturonase, putative / pectinase, putative  
deoxyindine 5'-triphosphate nucleotidohydrolase family  
3-HL-5-3H-TTG\_F3H TRANSFERASE (ARENT TESTA 6); naringenin 3-dioxygenase  
long-chain-fatty-acid-CoA ligase  
ATCSLD5, CSLD5, ATCSLD5 (Cellulose synthase-like D5); cellulose

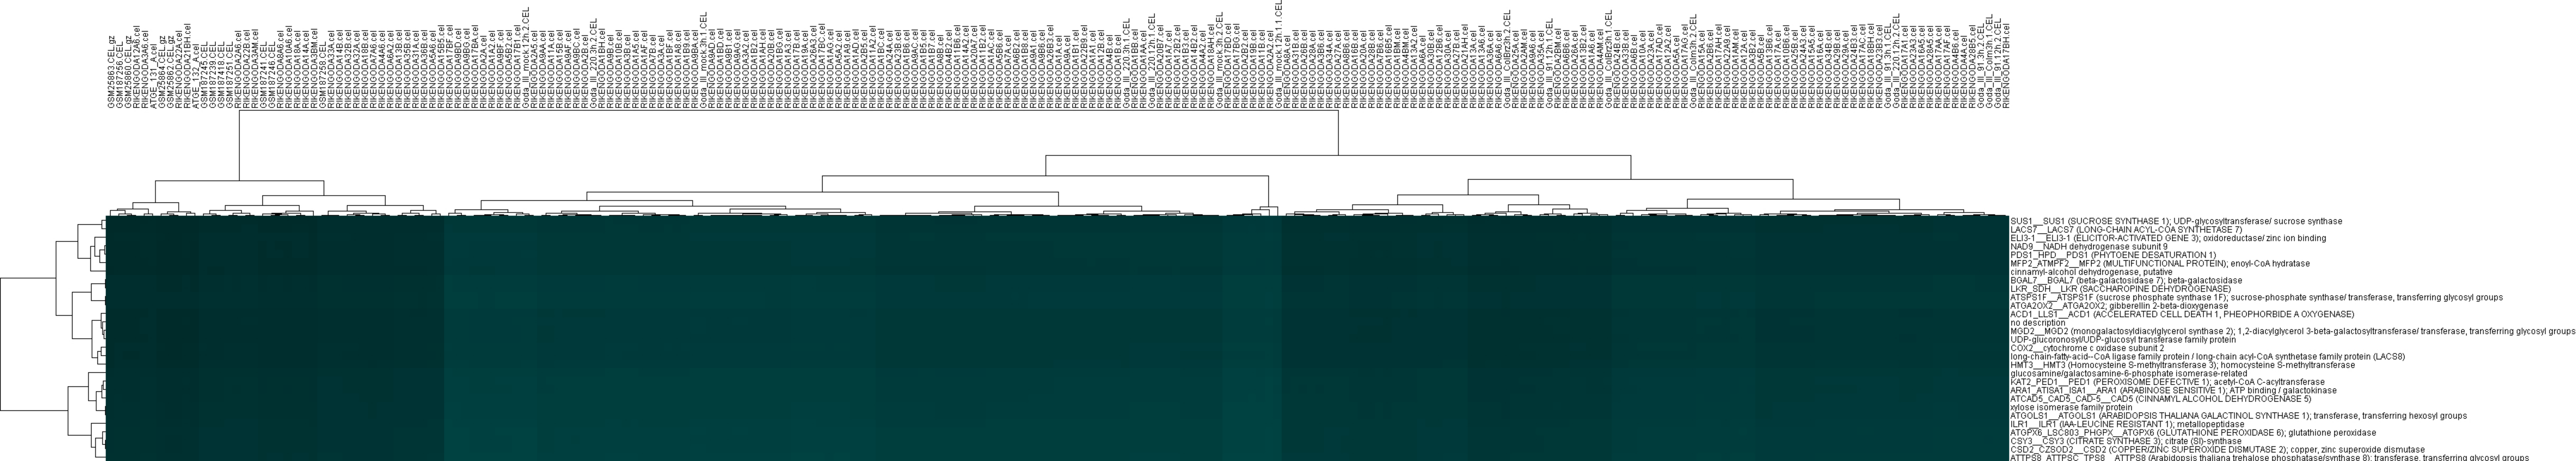

GSM25863\_CEL.gz  
GSM187256\_CEL  
GSM25860\_CEL.gz  
RIKENGODA12A6.cel  
RIKENGODA3A6.cel  
ATGE\_131\_A.cel  
GSM25864\_CEL.gz  
GSM25862\_CEL.gz  
RIKENGODA22A.cel  
RIKENGODA21BH.cel  
ATGE\_132\_A.cel  
GSM187245\_CEL  
GSM187239\_CEL  
GSM187418\_CEL  
GSM187251\_CEL  
RIKENGODA2A6.cel  
RIKENGODA22B.cel  
RIKENGODA3AM.cel  
GSM187241\_CEL  
GSM187246\_CEL  
RIKENGODA8A6.cel  
RIKENGODA10A6.cel  
RIKENGODA18A.cel  
RIKENGODA14A.cel  
RIKENGODA3BM.cel  
GSM187258\_CEL  
RIKENGODA33A.cel  
RIKENGODA14B.cel  
RIKENGODA32B.cel  
RIKENGODA32A.cel  
RIKENGODA18B.cel  
RIKENGODA7A6.cel  
RIKENGODA4A6.cel  
RIKENGODA8A2.cel  
RIKENGODA13B.cel  
RIKENGODA35B.cel  
RIKENGODA31A.cel  
RIKENGODA36B.cel  
RIKENGODA5A6.cel  
RIKENGODA15B5.cel  
RIKENGODA17BF.cel  
RIKENGODA9BD.cel  
RIKENGODA9BG.cel  
RIKENGODA17BA.cel  
RIKENGODA2A.cel  
RIKENGODA1A2.cel  
RIKENGODA9BF.cel  
RIKENGODA9B2.cel  
RIKENGODA17B1.cel  
Goda\_III\_mock12h1.2.CEL  
RIKENGODA2A5.cel  
RIKENGODA9AA.cel  
RIKENGODA11A.cel  
RIKENGODA15B.cel  
RIKENGODA9AF.cel  
RIKENGODA9BC.cel  
RIKENGODA2B.cel  
Goda\_III\_220\_3h.2.CEL  
RIKENGODA1BH.cel  
RIKENGODA9B.cel  
RIKENGODA10B.cel  
RIKENGODA3B.cel  
RIKENGODA1A5.cel  
RIKENGODA1AF.cel  
RIKENGODA7B.cel  
RIKENGODA3A.cel  
RIKENGODA1BF.cel  
RIKENGODA1A8.cel  
RIKENGODA1B9.cel  
RIKENGODA9BA.cel  
Goda\_III\_mock3h.1.CEL  
RIKENGODA9AD.cel  
RIKENGODA1BD.cel  
RIKENGODA9B1.cel  
RIKENGODA9AG.cel  
RIKENGODA3A2.cel  
RIKENGODA1B2.cel  
RIKENGODA1AH.cel  
RIKENGODA20B.cel  
RIKENGODA1BG.cel  
RIKENGODA1A3.cel  
RIKENGODA17B.cel  
RIKENGODA19A.cel  
RIKENGODA26A3.cel  
RIKENGODA17BC.cel  
RIKENGODA1AG.cel  
RIKENGODA5A2.cel  
RIKENGODA1A9.cel  
RIKENGODA1AD.cel  
RIKENGODA2B5.cel  
RIKENGODA11A2.cel  
RIKENGODA1BC.cel  
RIKENGODA24A.cel  
RIKENGODA23B.cel  
RIKENGODA1B6.cel  
RIKENGODA9AC.cel  
RIKENGODA1B5.cel  
RIKENGODA1B7.cel  
RIKENGODA8B.cel  
RIKENGODA4B2.cel  
RIKENGODA11B6.cel  
RIKENGODA14A2.cel  
RIKENGODA20A7.cel  
RIKENGODA11B2.cel  
RIKENGODA1AC.cel  
RIKENGODA5B6.cel  
RIKENGODA7A.cel  
RIKENGODA6B2.cel  
RIKENGODA1B8.cel  
RIKENGODA9A1.cel  
RIKENGODA9B6.cel  
RIKENGODA26B3.cel  
RIKENGODA1A.cel  
RIKENGODA1A.cel  
RIKENGODA9A.cel  
RIKENGODA1B1.cel  
RIKENGODA22B9.cel  
RIKENGODA1A1.cel  
RIKENGODA12B.cel  
RIKENGODA4B.cel  
RIKENGODA1B.cel  
Goda\_III\_220\_3h.1.CEL  
RIKENGODA1BB.cel  
RIKENGODA1AA.cel  
Goda\_III\_220\_12h.1.CEL  
RIKENGODA20B7.cel  
RIKENGODA1A7.cel  
RIKENGODA12B2.cel  
RIKENGODA1B3.cel  
RIKENGODA14B2.cel  
RIKENGODA4A2.cel  
RIKENGODA18AH.cel  
Goda\_III\_mock3h.2.CEL  
RIKENGODA17BD.cel  
RIKENGODA2B2.cel  
RIKENGODA19B.cel  
RIKENGODA11B.cel  
RIKENGODA2A2.cel  
RIKENGODA8A.cel  
RIKENGODA31B.cel  
RIKENGODA26B.cel  
RIKENGODA28A.cel  
RIKENGODA3B6.cel  
RIKENGODA3A.cel  
RIKENGODA27A.cel  
RIKENGODA8B6.cel  
RIKENGODA16B.cel  
RIKENGODA20A.cel  
RIKENGODA28B.cel  
RIKENGODA7B6.cel  
RIKENGODA16B5.cel  
RIKENGODA1BM.cel  
RIKENGODA4BM.cel  
RIKENGODA13A2.cel  
RIKENGODA6A.cel  
RIKENGODA30B.cel  
RIKENGODA12B6.cel  
RIKENGODA30A.cel  
RIKENGODA27B.cel  
RIKENGODA21AH.cel  
RIKENGODA13A6.cel  
RIKENGODA36A.cel  
RIKENGODA6A6.cel  
Goda\_III\_ColBr3h.2.CEL  
RIKENGODA25A.cel  
RIKENGODA2AM.cel  
RIKENGODA9A6.cel  
RIKENGODA35A.cel  
Goda\_III\_91\_12h.1.CEL  
RIKENGODA2BM.cel  
RIKENGODA6B6.cel  
RIKENGODA26A.cel  
RIKENGODA13B2.cel  
RIKENGODA1A6.cel  
RIKENGODA4AM.cel  
Goda\_III\_ColBr3h.1.CEL  
RIKENGODA24B.cel  
RIKENGODA33B.cel  
RIKENGODA8B.cel  
RIKENGODA10A.cel  
RIKENGODA23A.cel  
RIKENGODA17AD.cel  
RIKENGODA12A2.cel  
RIKENGODA5A.cel  
RIKENGODA17AG.cel  
Goda\_III\_Colm3h.2.CEL  
RIKENGODA17A1.cel  
RIKENGODA2B6.cel  
RIKENGODA17AH.cel  
RIKENGODA22A9.cel  
RIKENGODA23A.cel  
RIKENGODA12A.cel  
RIKENGODA5A.cel  
RIKENGODA29A.cel  
RIKENGODA24B3.cel  
RIKENGODA17AC.cel  
RIKENGODA18BH.cel  
RIKENGODA23B3.cel  
Goda\_III\_91\_3h.1.CEL  
Goda\_III\_220\_12h.2.CEL  
RIKENGODA17A1.cel  
RIKENGODA23A3.cel  
RIKENGODA16A5.cel  
RIKENGODA28A5.cel  
RIKENGODA17AA.cel  
RIKENGODA4B6.cel  
RIKENGODA4A.cel  
RIKENGODA28B5.cel  
Goda\_III\_91\_3h.2.CEL  
Goda\_III\_91\_12h.2.CEL  
RIKENGODA17BH.cel

SUS1\_\_SUS1 (SUCROSE SYNTHASE 1); UDP-glycosyltransferase/ sucrose synthase  
LACS7\_\_LACS7 (LONG-CHAIN ACYL-COA SYNTHETASE 7)  
ELI3-1\_\_ELI3-1 (ELICITOR-ACTIVATED GENE 3); oxidoreductase/ zinc ion binding  
NAD9\_\_NADH dehydrogenase subunit 9  
PDS1\_\_HPD\_PDS1 (PHYTOENE DESATURATION 1)  
MFP2\_\_ATMPF2\_\_MFP2 (MULTIFUNCTIONAL PROTEIN); enoyl-CoA hydratase  
cinnamyl-alcohol dehydrogenase, putative  
BGAL7\_\_BGAL7 (beta-galactosidase 7); beta-galactosidase  
LKR\_\_SDH\_\_LKR (SACCHAROPINE DEHYDROGENASE)  
ATSPS1F\_\_ATSPS1F (sucrose phosphate synthase 1F); sucrose-phosphate synthase/ transferase, transferring glycosyl groups  
ATGA2OX2\_\_ATGA2OX2; gibberellin 2-beta-dioxygenase  
ACD1\_\_LLS1\_\_ACD1 (ACCELERATED CELL DEATH 1, PHEOPHORBIDE A OXYGENASE)  
no description  
MGD2\_\_MGD2 (monogalactosyldiacylglycerol synthase 2); 1,2-diacylglycerol 3-beta-galactosyltransferase/ transferase, transferring glycosyl groups  
UDP-glucuronosyl/UDP-glucosyl transferase family protein  
COX2\_\_cytochrome c oxidase subunit 2  
long-chain-fatty-acid--CoA ligase family protein / long-chain acyl-CoA synthetase family protein (LACS8)  
HMT3\_\_HMT3 (Homocysteine S-methyltransferase 3); homocysteine S-methyltransferase  
glucosamine/galactosamine-6-phosphate isomerase-related  
KAT2\_\_PED1\_\_PED1 (PEROXISOME DEFECTIVE 1); acetyl-CoA C-acyltransferase  
ARA1\_\_ATISAT\_\_ISA1\_\_ARA1 (ARABINOSE SENSITIVE 1); ATP binding / galactokinase  
ATCAD5\_\_CAD5\_\_CAD-5\_\_CAD5 (CINNAMYL ALCOHOL DEHYDROGENASE 5)  
xylose isomerase family protein  
ATGOLS1\_\_ATGOLS1 (ARABIDOPSIS THALIANA GALACTINOL SYNTHASE 1); transferase, transferring hexosyl groups  
ILR1\_\_ILRT (IAA-LEUCINE RESISTANT 1); metalloproteinase  
ATGPX6\_\_LSC803\_\_PHGPX\_\_ATGPX6 (GLUTATHIONE PEROXIDASE 6); glutathione peroxidase  
CSY3\_\_CSY3 (CITRATE SYNTHASE 3); citrate (S)-synthase  
CSD2\_\_CSD2\_\_CSD2 (COPPER/ZINC SUPEROXIDE DISMUTASE 2); copper, zinc superoxide dismutase  
ATTPS8\_\_ATTPS8\_\_TPS8\_\_ATTPS8 (Arabidopsis thaliana trehalose phosphatase/synthase 8); transferase, transferring glycosyl groups

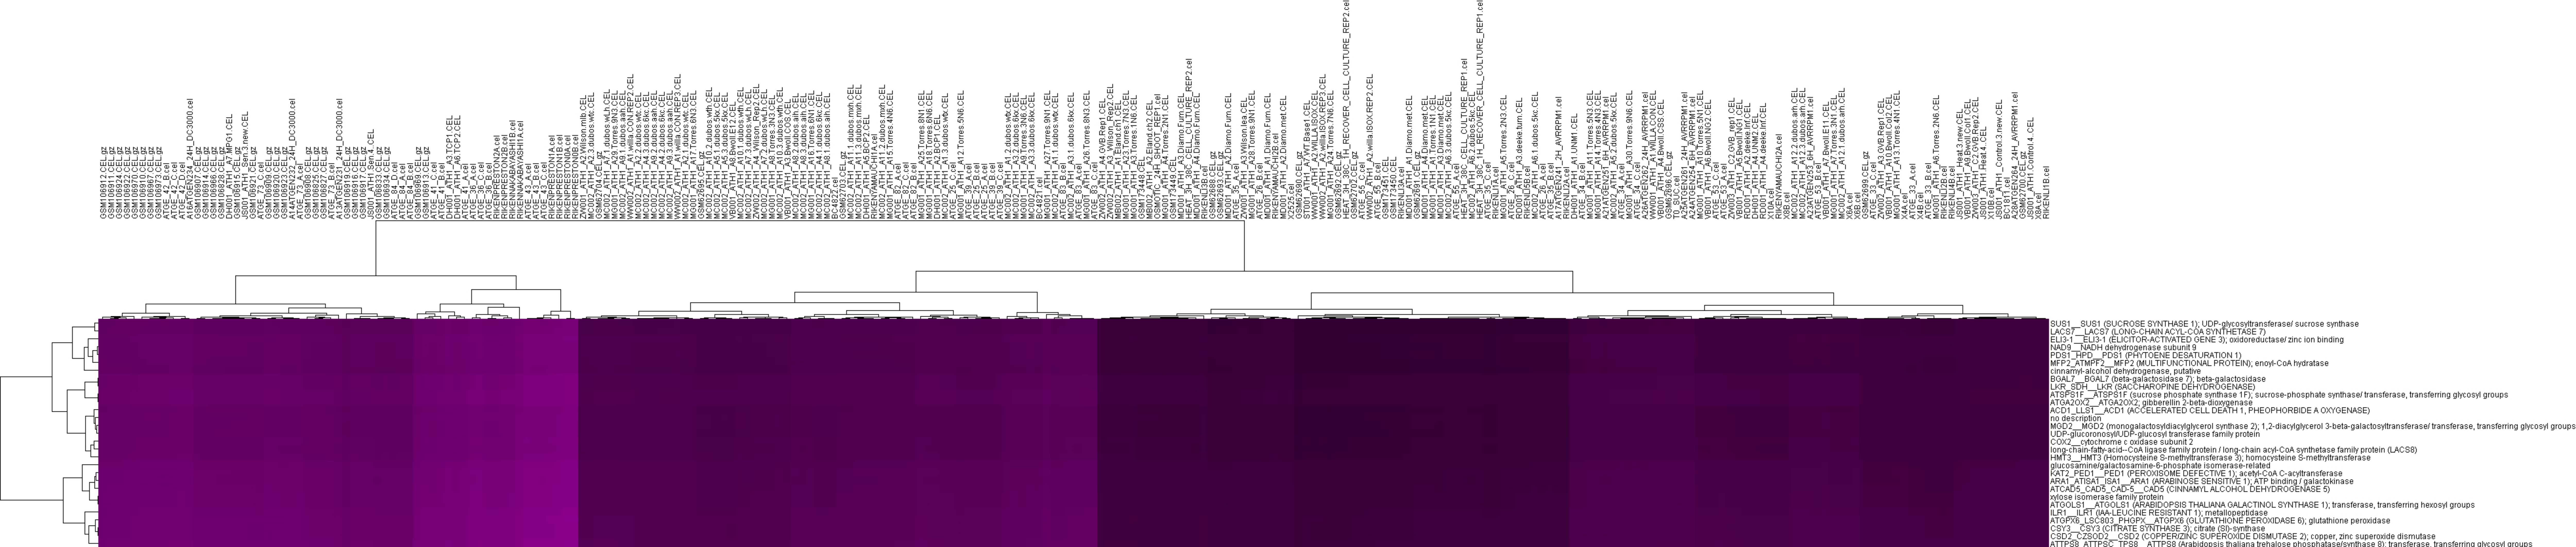

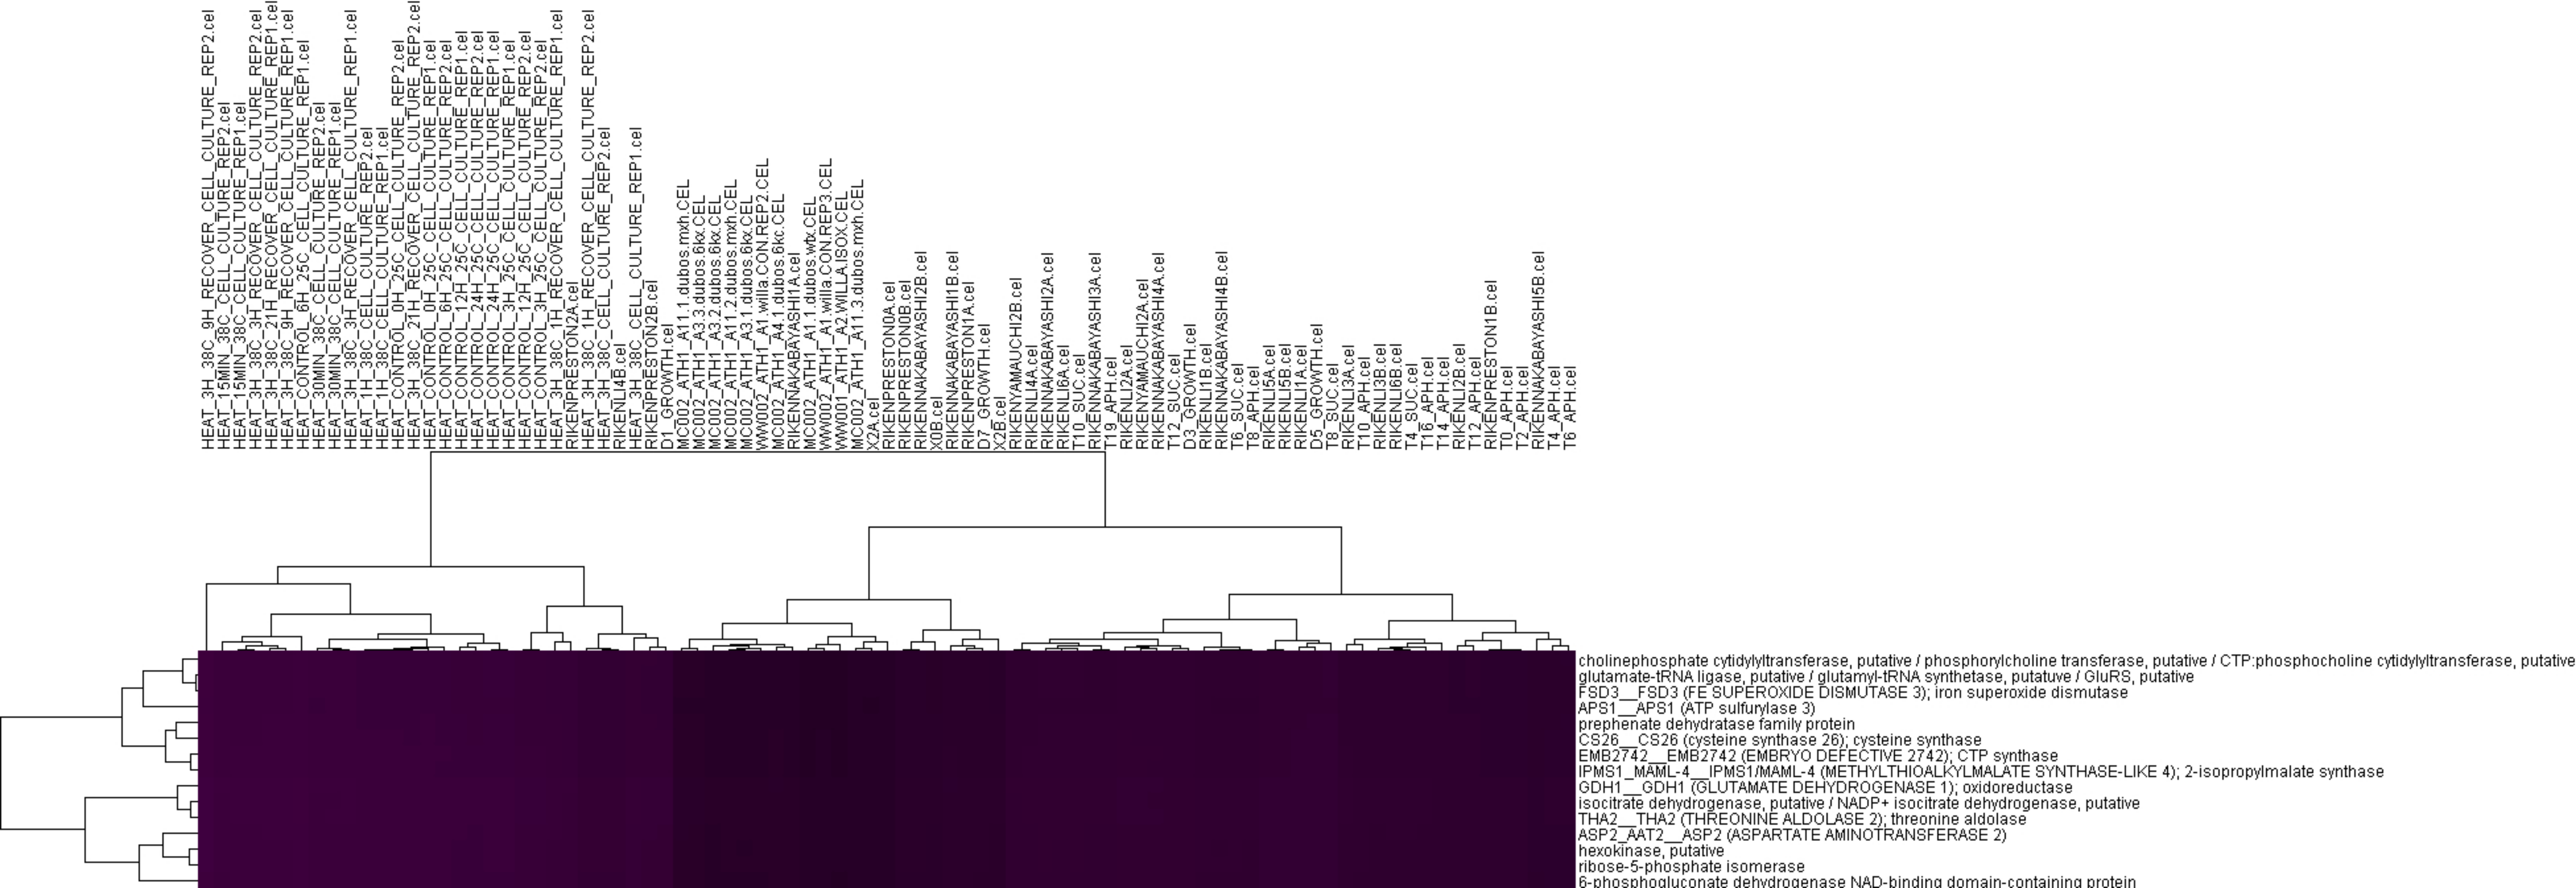

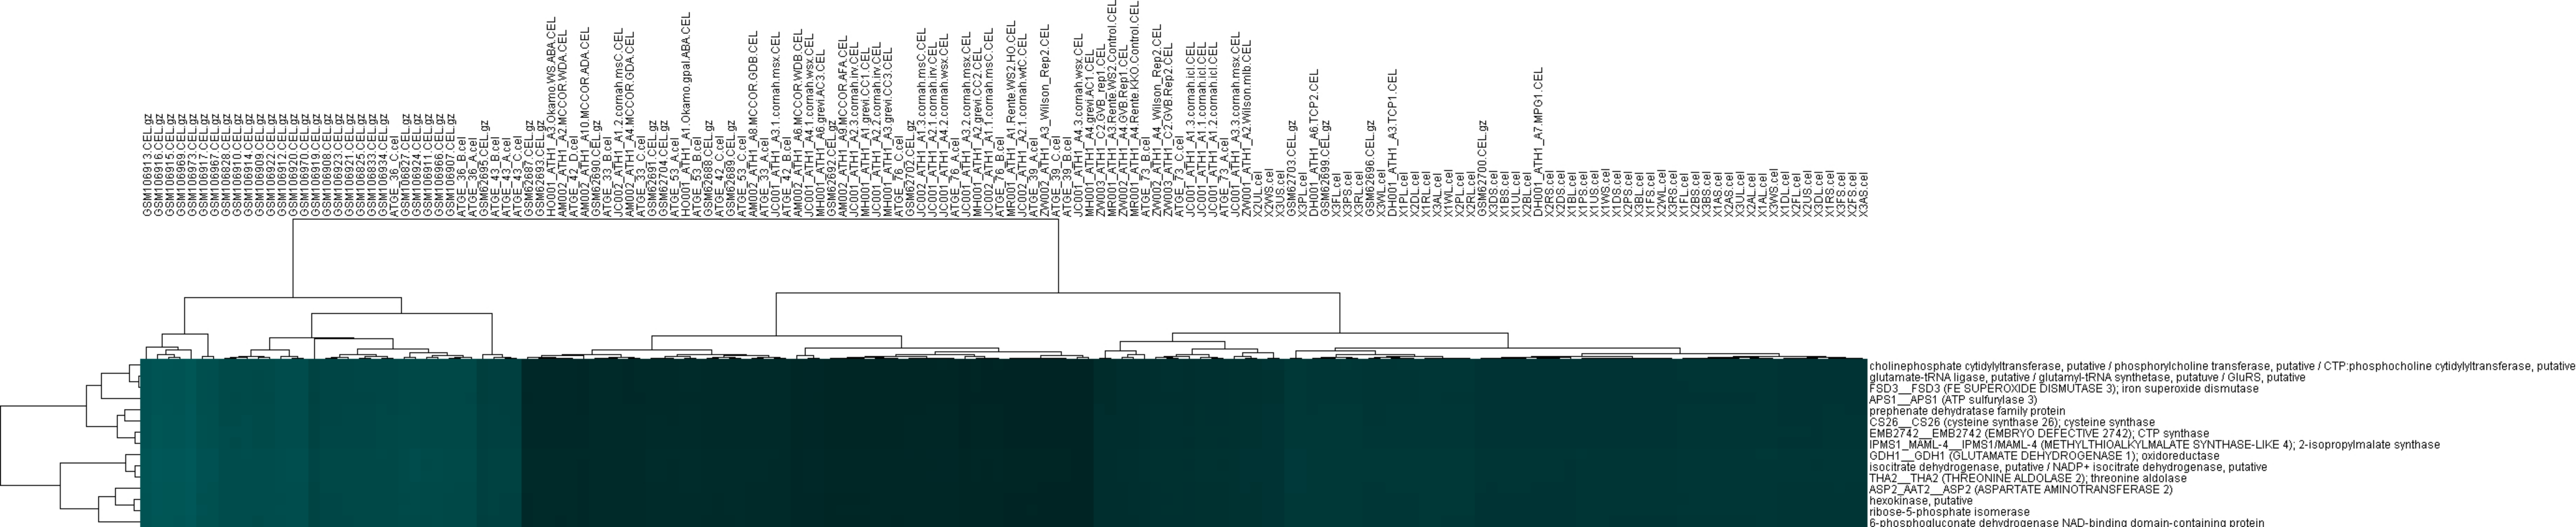

Supplement: dsn025_1.pdf [file dsn025_1.pdf]
